# Supplementary material for: A genetically engineered human pancreatic β cell line exhibiting glucose-inducible insulin secretion
Source: JCI journal article supplement (doi:10.1172/jci58447), 2011-08-25
Supplement: sd1 [file 1]

## **SUPPLEMENTARY FIGURES**

### **Figure S1: Efficient transduction of human adult islets with SV40LT expressing lentiviral vector**

Human adult islets preparations were partially dissociated, transduced with an SV40LT-expressing lentiviral vector and analyzed one week after transduction. Many insulin (INS)-positive cells (red) co-stained for SV40LT (green). Nuclei were stained with Hoechst 33342 fluorescent stain (blue). Scale bar: 200  $\mu\text{m}$

### **Figure S2: Beta cell composition of a human adult islet preparation**

A fraction of the human islet preparation that was used for real time PCR was analyzed by immunohistochemistry in order to evaluate the relative size of the beta cell population in a human islet preparation. Insulin (INS)-positive cells (red) constituted approximately 40% of the total cell number, as measured by nuclei staining with Hoechst 33342 fluorescent stain (blue). Scale bar: 300  $\mu\text{m}$

### **Figure S3: Immunofluorescence analysis of EndoC- $\beta$ H1 cells.**

EndoC- $\beta$ H1 cells stained negative for glucagon (GCG), amylase (AMYL) and SOX9. Cells that co-expressed INS and somatostatin (SST) were rarely seen. Scale bar: 25  $\mu\text{m}$

Nuclei

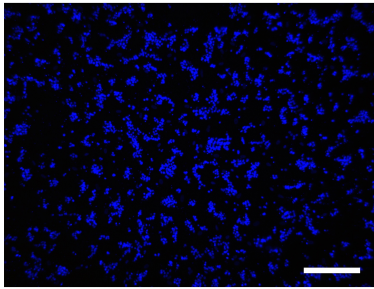

INS

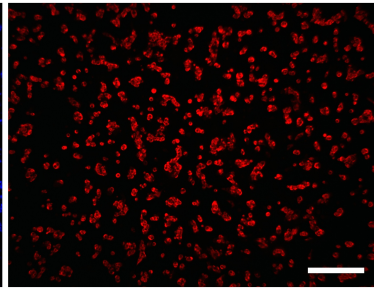

SV40LT

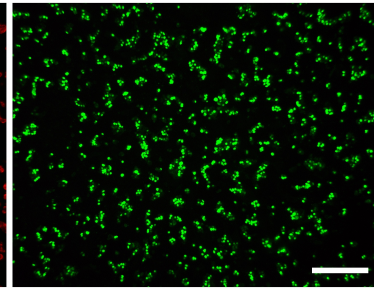

INS SV40LT

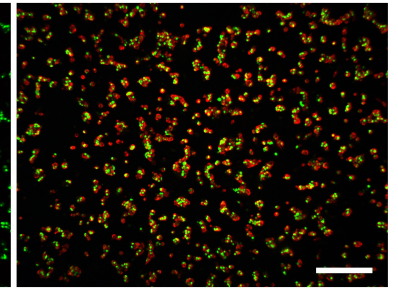

Nuclei

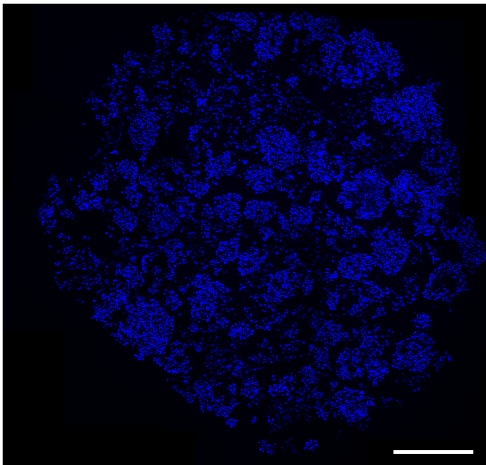

INS

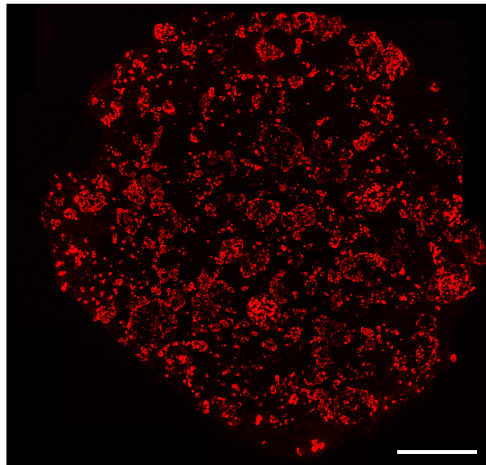

Nuclei INS

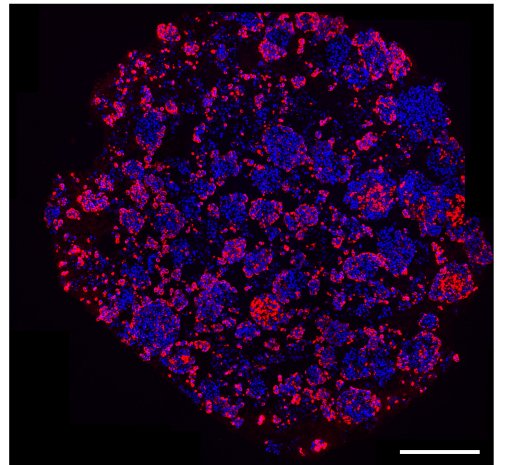

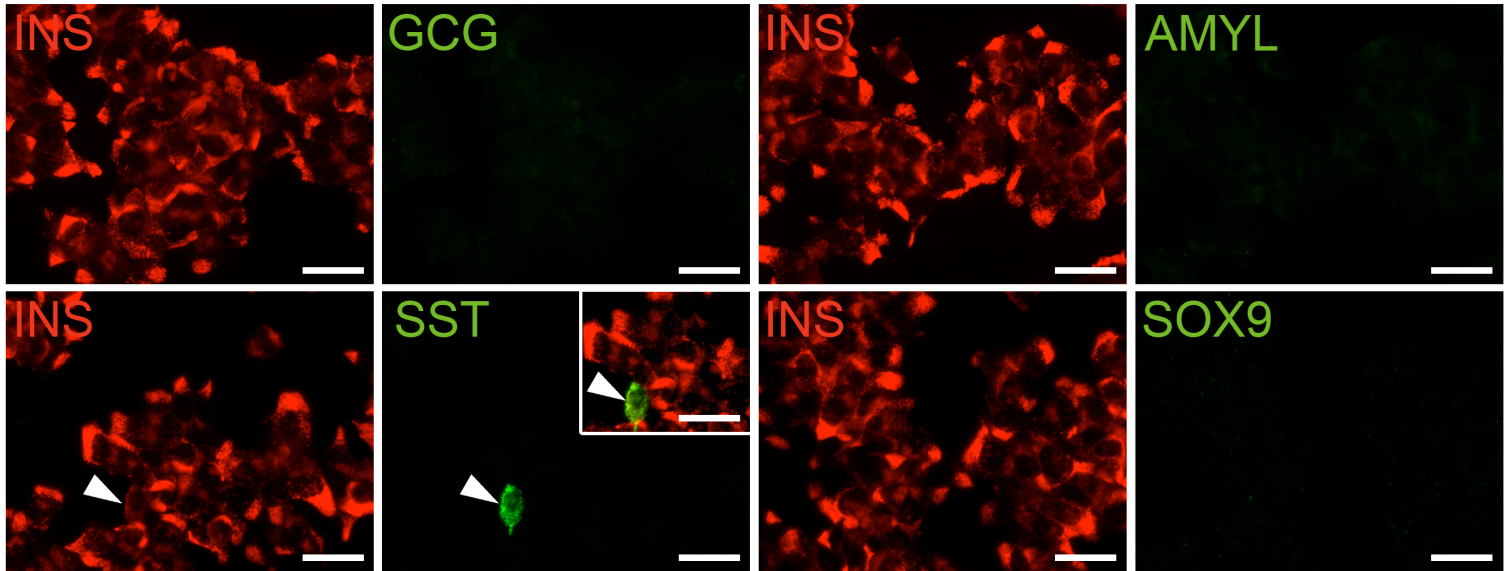

Table 1: Taqman gene expression assay probes.

|               |         |
|---------------|---------|
| Hs02741908_m1 | INS     |
| Hs00169095_m1 | IAPP    |
| Hs00174967_m1 | GCG     |
| Hs00356144_m1 | SST     |
| Hs00426216_m1 | PDX1    |
| Hs01651425_s1 | MAFA    |
| Hs00232355_m1 | NKX6-1  |
| Hs00240871_m1 | PAX6    |
| Hs00159598_m1 | NEUROD1 |
| Hs01096908_m1 | SLC2A2  |
| Hs00277220_m1 | GCK     |
| Hs00265026_s1 | KCNJ11  |
| Hs00165861_m1 | ABCC8   |
| Hs00175619_m1 | PCSK1   |
| Hs00545183_m1 | SLC30A8 |
| Hs00374262_m1 | RAB3A   |
| Hs00268296_m1 | SNAP25  |
| Hs00609534_m1 | GAD2    |
| Hs00160947_m1 | PTPRN   |
| Hs00156992_m1 | CPA1    |
| Hs00357011_m1 | CFTR    |
| Hs99999904_m1 | PPIA    |
